# Supplementary material for: Erythroid differentiation regulator-1 induced by microbiota in early life drives intestinal stem cell proliferation and regeneration
Source: PubMed Central journal article supplement (PMC6981263; doi:10.1038/s41467-019-14258-z), 2020-01-24
Supplement: 41467_2019_14258_MOESM4_ESM.pdf [file 41467_2019_14258_MOESM4_ESM.pdf]

## **Description of Additional Supplementary Files**

File name : Supplementary Data 1

Description : Analyzed data of RNAseq related to Figure 1b.

File name : Supplementary Movie 1

Description : The movie of wound healing assay related to Figure 6a.
